# Supplementary material for: Increasing Pt oxygen reduction reaction activity and durability with a carbon-doped TiO2 nanocoating catalyst support
Source: Royal Society of Chemistry journal article supplement (doi:10.1039/c2jm32234j), 2012-01-01
Supplement: c2jm32234j.pdf [file c2jm32234j.pdf]

## Electronic Supplementary Information (ESI)

### **Increasing Pt oxygen reduction reaction activity and durability with carbon-doped TiO<sub>2</sub> nanocoating catalyst support**

Kan Huang<sup>a</sup>, Kotaro Sasaki<sup>b</sup>, Radoslav R. Adzic<sup>b</sup>, Yangchuan Xing<sup>\*ac</sup>

---

<sup>a</sup> Department of Chemical and Biological Engineering, Missouri University of Science and Technology, Rolla, Missouri 65409.

<sup>b</sup> Chemistry Department, Brookhaven National Laboratory, Upton, NY 11973.

<sup>c</sup> Department of Chemical Engineering, University of Missouri, Columbia, Missouri 65211. E-mail: xingy@missouri.edu

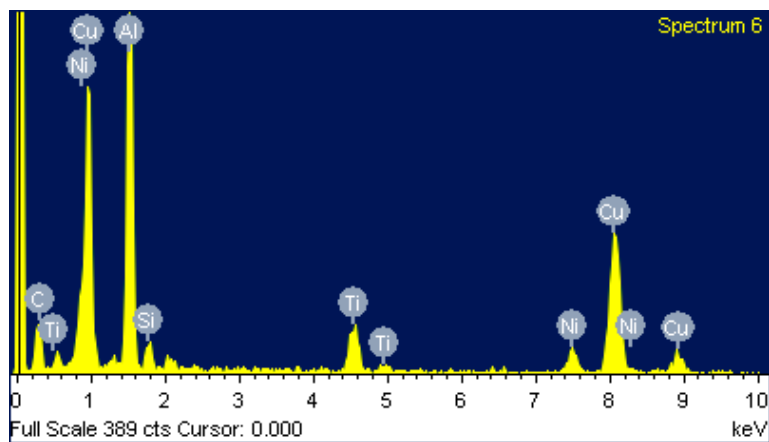

**Fig. S1.** EDX of a  $\text{TiO}_2/\text{CNT}$  sample supported on a copper mesh TEM grid, showing the presence of Ti element. Some background elements (Cu, Ni, Al) of the sample support (TEM grid) are also present.

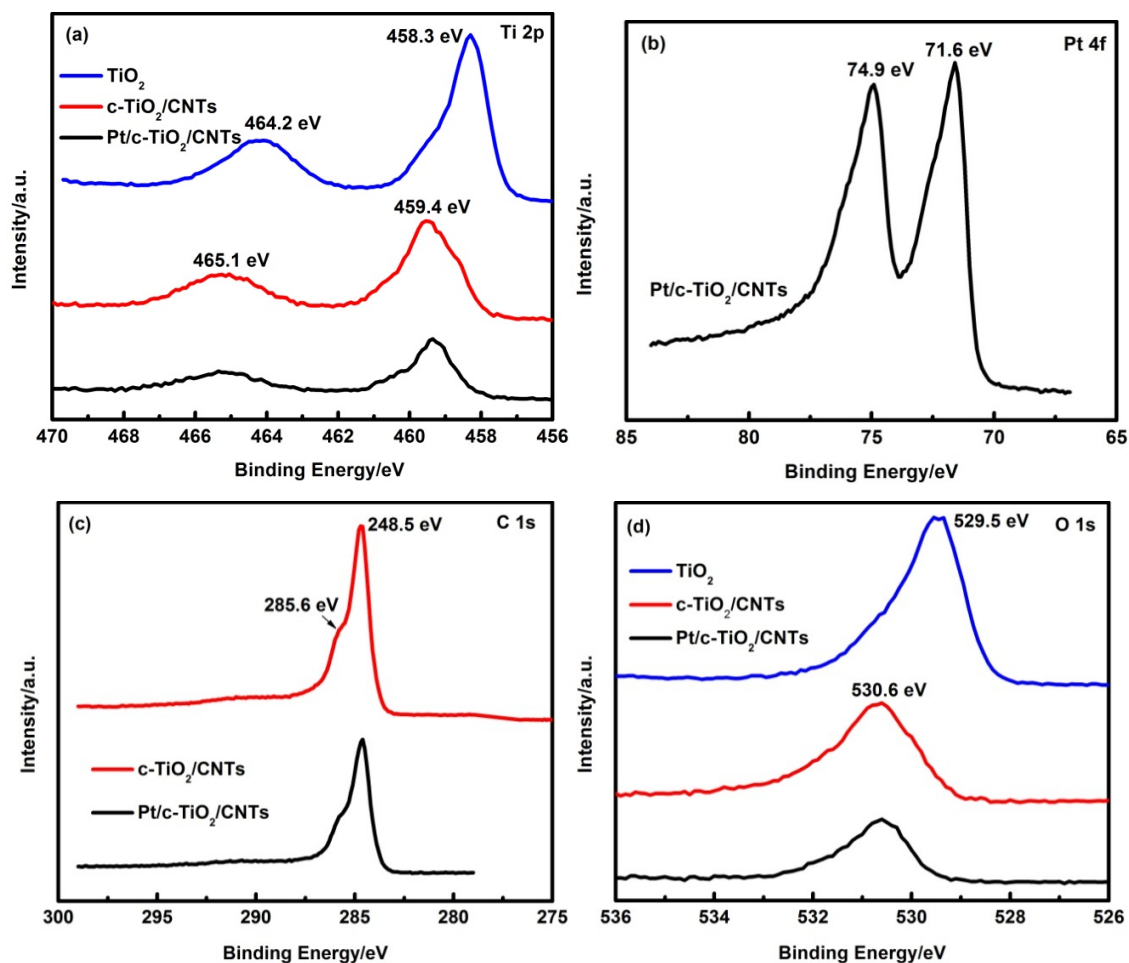

**Fig. S2.** Comparison of XPS results of Ti 2p, O1s, C 1s and Pt 4f from samples of pure  $\text{TiO}_2$ ,  $\text{c-TiO}_2/\text{CNTs}$  and  $\text{Pt/c-TiO}_2/\text{CNTs}$ . They show that although carbon doping shifts the binding energies, Pt deposition does not.

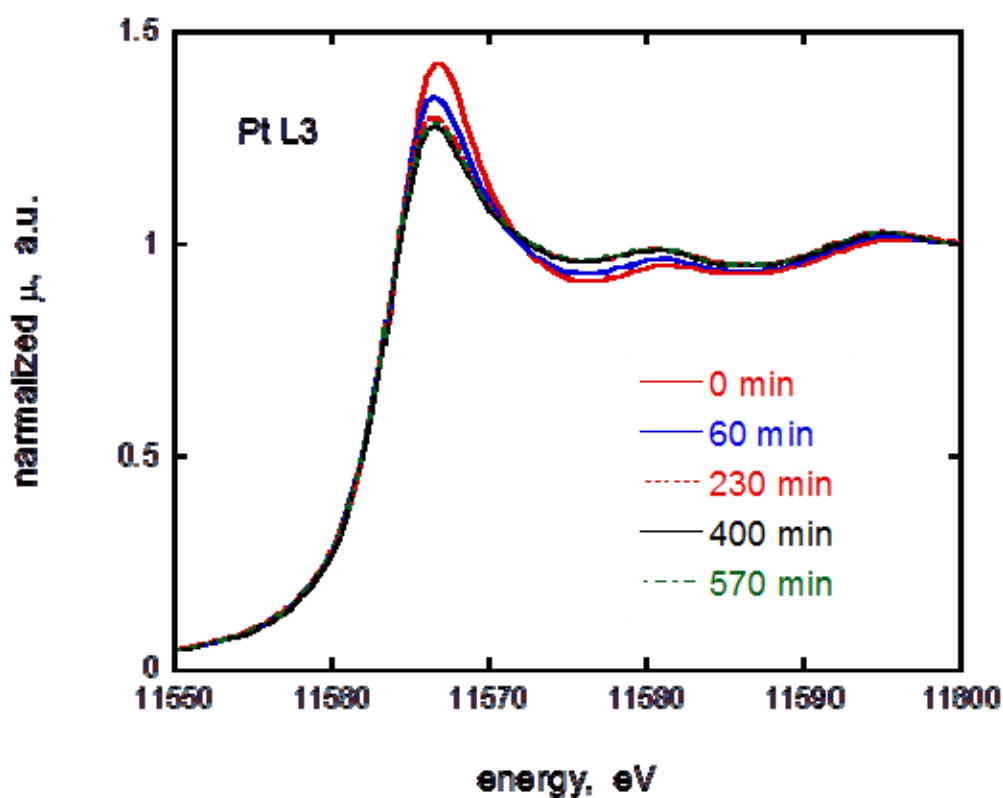

**Fig. S3.** In situ XANES spectra of Pt L3 edge from Pt/TiO<sub>2</sub>/CNTs in 1M HClO<sub>4</sub> at a potential of 0.41 V with polarization time.

Figure S3 shows in situ XANES spectra of Pt L3 edge from Pt/TiO<sub>2</sub>/CNTs in 1M HClO<sub>4</sub> at a potential of 0.41 V with polarization time. The intensity of the white line (the first peak) is high immediately after applying the potential, due to the presence of Pt oxides; it decays very slowly with polarization time due to reduction of the Pt oxides. The slow reduction is likely caused by the poor conductivity of the TiO<sub>2</sub> support. Such that the long delay in reduction is not observed for the conductive supports, such as Pt/c-TiO<sub>2</sub>/CNTs.
